# Supplementary material
Source: PubMed Central journal article supplement (PMC6688895)
Supplement: EMS83913-supplement-Supplementary_Figures_S1_S3_and_Table_S1.pdf [file EMS83913-supplement-Supplementary_Figures_S1_S3_and_Table_S1.pdf]

## Supplement

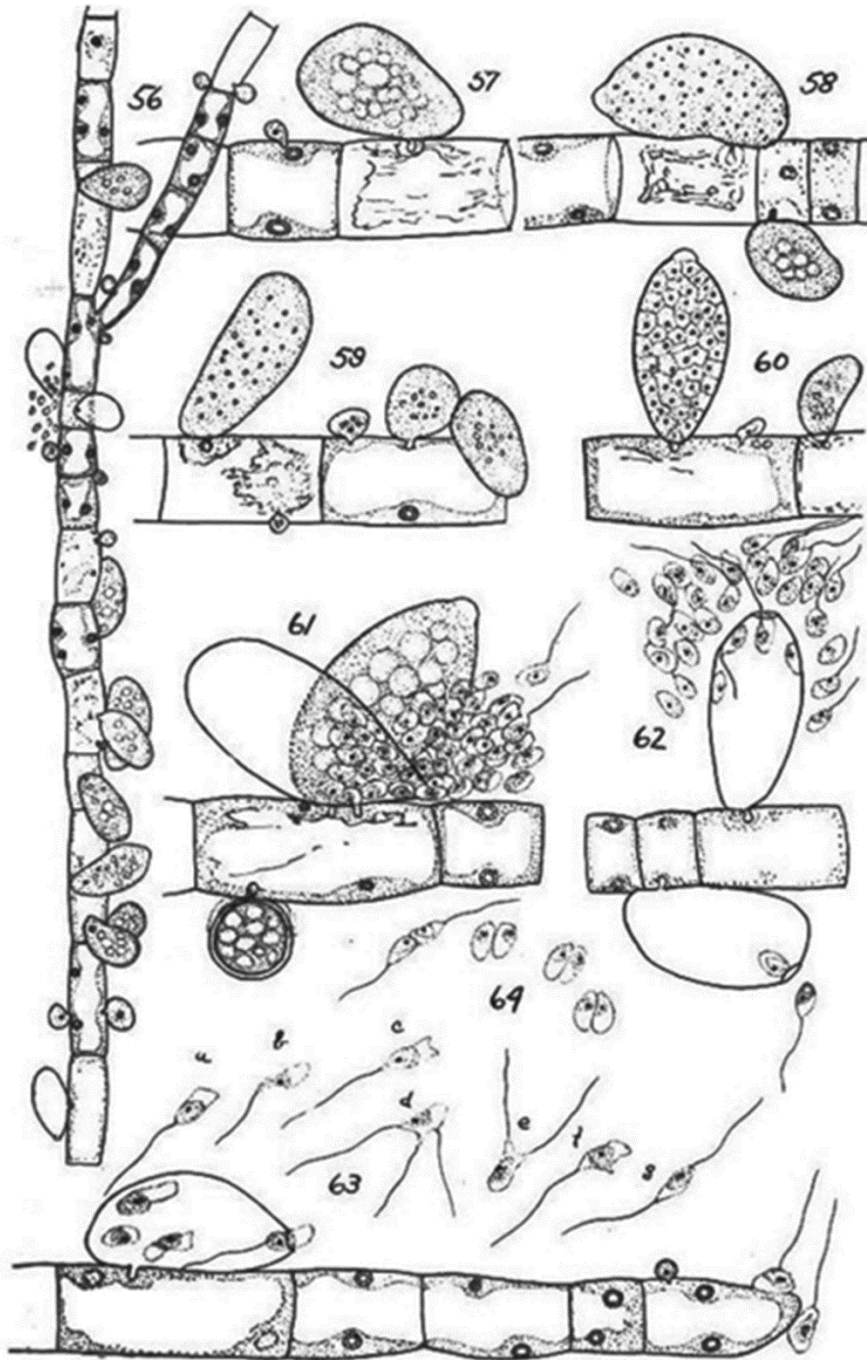

**Fig. S1.** Copy of Fig. 56-64 by Couch (1935): *Plectidium anatropum* (Braun) Sparrow. 56, habit sketch showing numerous parasites on thread of *Stigeoclonium*: 57-60, Sporangia in various stages of development. The large sporangium in figure 57 and the smaller one in figure 58 show thick peripheral, hyaline zone of cytoplasm surrounding central region of globules. Larger sporangia, figure 58 and 59, show minute droplets, one for each spore; 61-63, sporangia with spores in the act of emerging. Note how spores hover around sporangial mouth, figure 61 and 62. In figure 63 the letters show successive changes in the same spore as it was watched during a period of several minutes. In figure 61 one resting sporangium is shown; 64, gametes in act of fusion. Four pairs are shown. Many such were seen. Fig. 56 x620; others x1250.

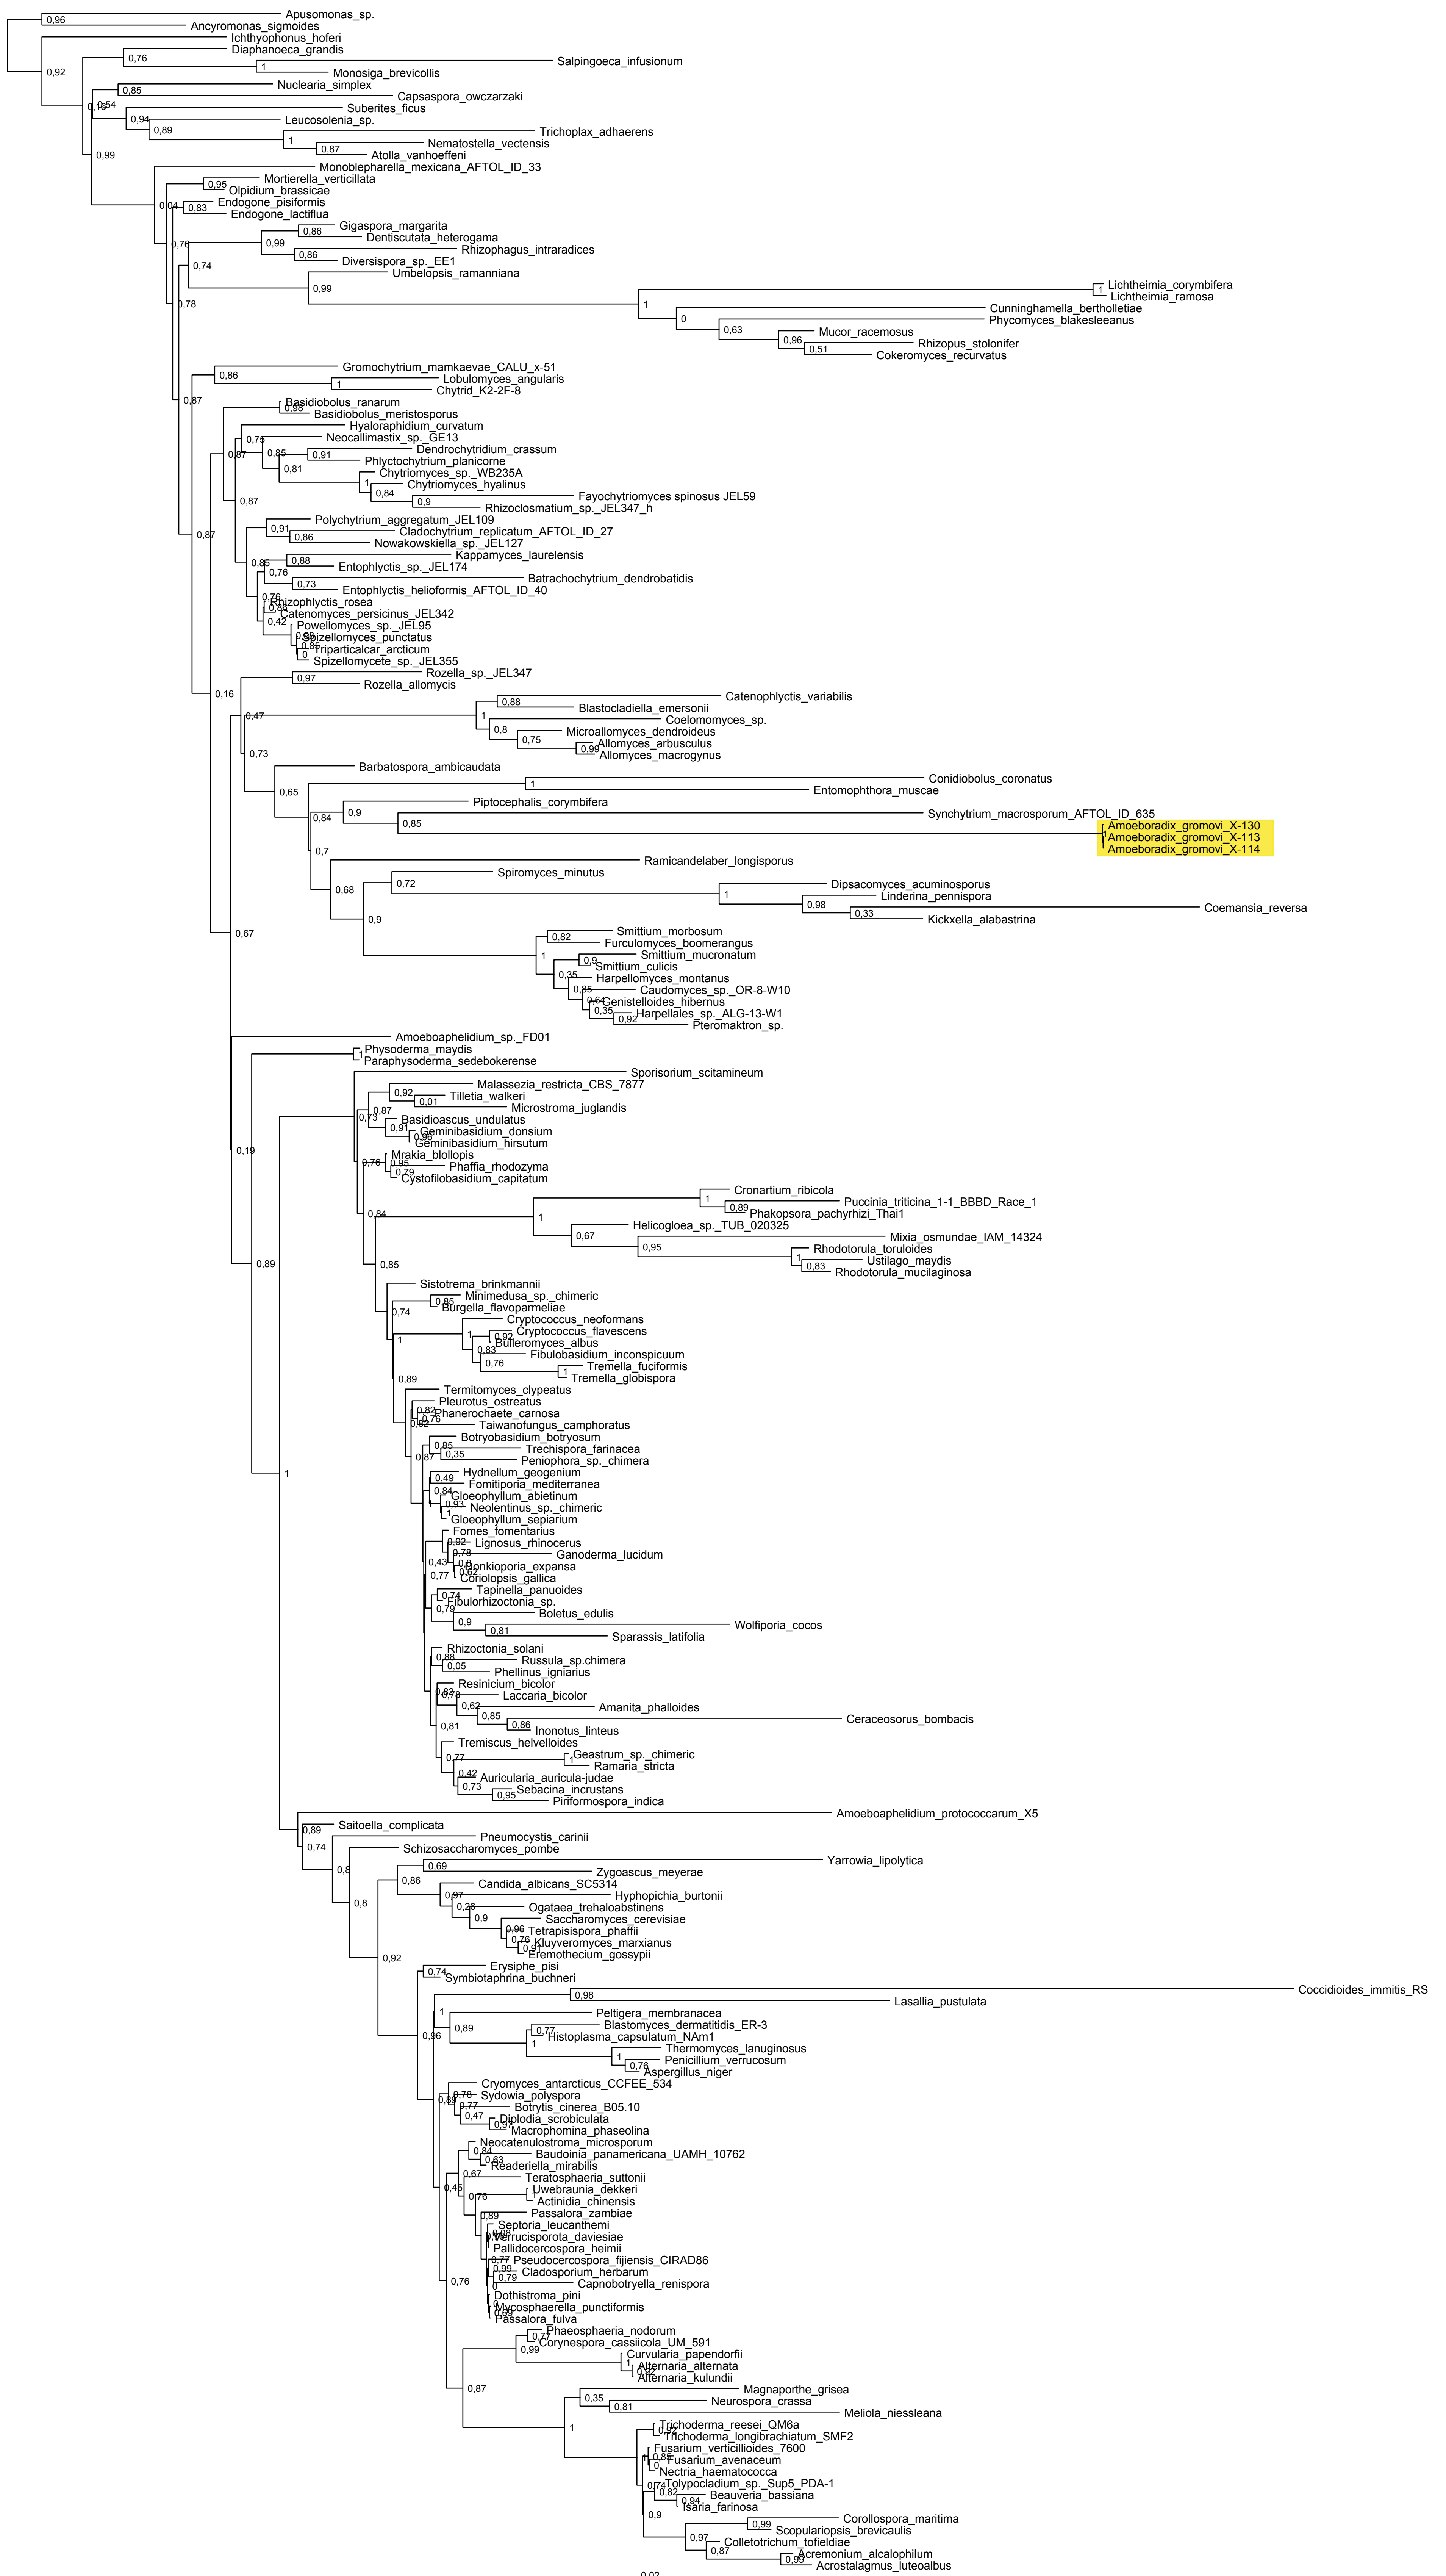

**Supplementary Figure S2.** Bayesian phylogenetic tree of fungi including *Amoeboradix gromovi* strains X-113, X-114 and X-130. The tree is based on 18S rRNA sequences (1352 conserved sites) and is rooted on 12 opisthokont sequences. Numbers at nodes are Bayesian posterior probability values.

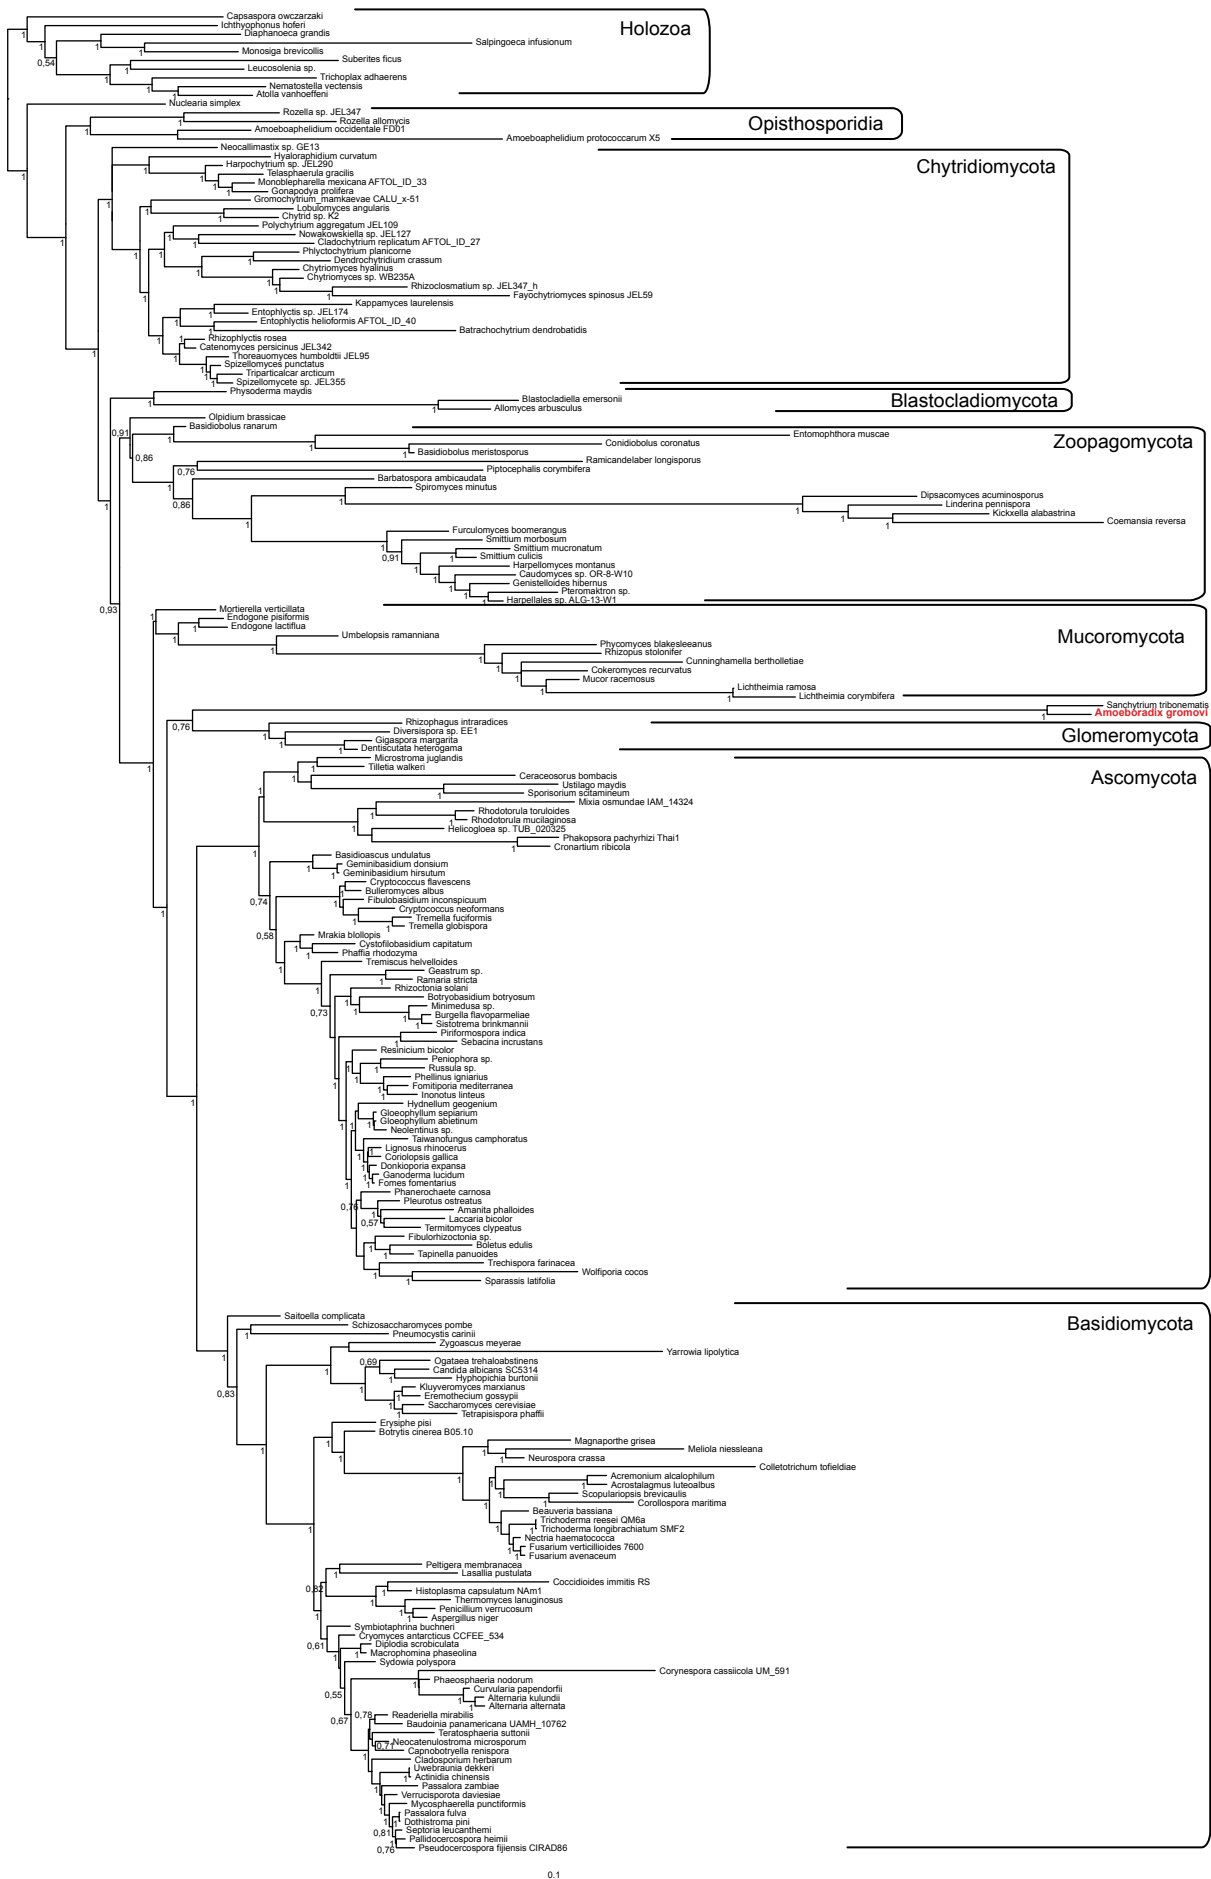

Figure S3. Bayesian phylogenetic tree of fungi corresponding to Figure 9 (main text).

**Table S1.** Accession numbers of the 18S and 28S rRNA gene sequences used in this work.

| <b>Species</b>                              | <b>18S rRNA</b> | <b>28S rRNA</b> |
|---------------------------------------------|-----------------|-----------------|
| <i>Acremonium alcalophilum</i>              | JX158486.1      | JX158443.1      |
| <i>Acrostalagmus luteoalbus</i>             | KJ443096.1      | KJ443141.1      |
| <i>Actinidia chinensis</i>                  | AONS01020919    | AONS01020919    |
| <i>Allomyces arbusculus</i>                 | NG_017166.1     | AY552525.1      |
| <i>Alternaria alternata</i>                 | U05194.1        | LMXP01000007    |
| <i>Alternaria kulundii</i>                  | KJ443084.1      | KJ443132        |
| <i>Amanita phalloides</i>                   | HQ539826.1      | DQ071721.2      |
| <i>Amoebophilidium protococcarum</i> X5     | JX507298.1      | JX507298.1      |
| <i>Amoebophilidium occidentale</i> FD01     | JX967274.1      | JX967274.1      |
| <i>Amoeboradix gromovi</i>                  | MG256970        | MG256970        |
| <i>Aspergillus niger</i>                    | AM270052.1      | AM270052.1      |
| <i>Atolla vanhoeffeni</i>                   | AF100942.1      | AY026368        |
| <i>Barbatospora ambicaudata</i>             | KC297614.1      | KF848899.1      |
| <i>Basidioascus undulatus</i>               | JX242889.1      | JTLS01001059    |
| <i>Basidiobolus meristosporus</i>           | JX242609.1      | JNEO01020332    |
| <i>Basidiobolus ranarum</i>                 | NG_017184.1     | NG_027562.1     |
| <i>Batrachochytrium dendrobatidis</i>       | AF051932.1      | NG_027619.1     |
| <i>Baudoinia panamericana</i> UAMH 10762    | EF137355.1      | AEIF01000034    |
| <i>Beauveria bassiana</i>                   | EU334677.1      | EU334677.1      |
| <i>Blastocladiella emersonii</i>            | AY635842.1      | DQ273808.1      |
| <i>Boletus edulis</i>                       | DQ534675.1      | DQ071747.2      |
| <i>Botryobasidium botryosum</i>             | AY662667.1      | AYEP01001617    |
| <i>Botrytis cinerea</i> B05.10              | AAID02000333    | AAID02000582    |
| <i>Bulleromyces albus</i>                   | X60179.1        | KU179840.1      |
| <i>Burgella flavoparmeliae</i>              | DQ915455.1      | DQ915469.1      |
| <i>Candida albicans</i> SC5314              | XR_002086442.1  | CP017630.1      |
| <i>Capnobotryella renispora</i>             | Y18698.1        | GU214398.1      |
| <i>Capsaspora owczarzaki</i>                | AF349564.1      | AY724688.1      |
| <i>Catenomyces persicinus</i> JEL342        | AY635830.1      | DQ273789.1      |
| <i>Caudomyces</i> sp. OR-8-W10              | KC297620.1      | KF848906.1      |
| <i>Ceraceosorus bombacis</i>                | DQ875377.1      | CCYA01000118    |
| <i>Chytriomycetes hyalinus</i>              | AB586078.1      | DQ273836.2      |
| <i>Chytriomycetes</i> sp. WB235A            | DQ536486.1      | DQ536493.1      |
| <i>Fayochytriomycetes spinosus</i> JEL59    | AH009063.2      | DQ273839.1      |
| <i>Cladochytrium replicatum</i> AFTOL ID 27 | NG_017169.1     | NG_027614.1     |
| <i>Cladosporium herbarum</i>                | EU343068.1      | GU214410.1      |
| <i>Coccidioides immitis</i> RS              | XR_001099882.1  | XR_001099875.1  |
| <i>Coemansia reversa</i>                    | AY546685.1      | NG_027615.1     |
| <i>Cokeromyces recurvatus</i>               | AF113416.1      | DQ273812.1      |
| <i>Colletotrichum tofieldiae</i>            | LFHR01000284    | LFHQ01000284    |
| <i>Conidiobolus coronatus</i>               | AF296753.1      | NG_027617.1     |
| <i>Corioliopsis gallica</i>                 | AY336772.1      | GBYM01000018    |
| <i>Corollospora maritima</i>                | GDFX01000012    | GDFX01000030    |
| <i>Corynespora cassiicola</i> UM 591        | GU296145.1      | JAQF01001762    |
| <i>Cronartium ribicola</i>                  | M94338.1        | GBSG01008323    |
| <i>Cryomyces antarcticus</i> CCREE 534      | AYQD01000402    | AYQD01000402    |
| <i>Cryptococcus flavescens</i>              | AB085796.1      | CAUG01000044    |
| <i>Cryptococcus neoformans</i>              | CP022322.1      | CP022322.1      |
| <i>Cunninghamella bertholletiae</i>         | DQ155289.1      | JNEG01000571    |

|                                             |                |                |
|---------------------------------------------|----------------|----------------|
| <i>Curvularia papendorffii</i>              | JXCC01000148   | JXCC01000148   |
| <i>Cystofilobasidium capitatum</i>          | D12801.1       | FJ644524.2     |
| <i>Dendrochytridium crassum</i>             | AY635827.1     | DQ273785.1     |
| <i>Dentiscutata heterogama</i>              | AJ306434.1     | NG_027651.1    |
| <i>Diaphanoeca grandis</i>                  | AF084234.1     | EU011939.1     |
| <i>Diplodia scrobiculata</i>                | LAEG01000342   | LAEG01000342   |
| <i>Dipsacomyces acuminosporus</i>           | AF007534.1     | KF848901.1     |
| <i>Diversispora</i> sp. EE1                 | HE863862.1     | HE863901.1     |
| <i>Donkioporia expansa</i>                  | AJ540307.1     | AJ583428.1     |
| <i>Dothiostroma pini</i>                    | GU214532.1     | GU214426.1     |
| <i>Endogone lactiflua</i>                   | JF414201.1     | DQ273788.1     |
| <i>Endogone pisiformis</i>                  | X58724.1       | NG_027563.1    |
| <i>Entomophthora muscae</i>                 | NG_017183.1    | NG_027647.1    |
| <i>Entophlyctis helioformis</i> AFTOL ID 40 | AY635826.1     | DQ273784.1     |
| <i>Entophlyctis</i> sp. JEL174              | AY635824.1     | DQ273782       |
| <i>Eremothecium gossypii</i>                | NR_149589.1    | NR_149706.1    |
| <i>Erysiphe pisi</i>                        | CACM01000325   | CACM01000006   |
| <i>Fibulobasidium inconspicuum</i>          | JN043552.1     | EF551315.1     |
| <i>Fibulorhizoctonia</i> sp.                | AY654887.1     | LNCK01003549   |
| <i>Fomes fomentarius</i>                    | U59069.1       | DQ208418.1     |
| <i>Fomitiporia mediterranea</i>             | AY662664.1     | AEJJ01002640   |
| <i>Furculomyces boomerangus</i>             | AF007535.1     | DQ273809.1     |
| <i>Fusarium avenaceum</i>                   | JQGD01000001   | JQGD01000001   |
| <i>Fusarium verticillioides</i> 7600        | XR_001989355.1 | XR_001989352.1 |
| <i>Ganoderma lucidum</i>                    | FJ379281.1     | DQ208410.1     |
| <i>Geastrum</i> sp.                         | AF026620.1     | FJ644508.2     |
| <i>Geminibasidium donsium</i>               | JX242892.1     | NG_042694.1    |
| <i>Geminibasidium hirsutum</i>              | JX242894.1     | NG_042695.1    |
| <i>Genistelloides hibernus</i>              | AF007536.1     | KF848908.1     |
| <i>Gigaspora margarita</i>                  | AJ852603.1     | HF968961.1     |
| <i>Gloeophyllum abietinum</i>               | AJ560802.1     | AJ583431.1     |
| <i>Gloeophyllum sepiarium</i>               | AF026608.1     | JX507713.1     |
| <i>Gonapodya prolifera</i>                  | KJ668057.1     | KJ668096.1     |
| <i>Gromochytrium mamkaevae</i>              | KF586842.1     | KF586842.1     |
| <i>Harpellales</i> sp. ALG-13-W1            | JX155624.1     | KF848905.1     |
| <i>Harpellomyces montanus</i>               | JQ302887.1     | KF848903.1     |
| <i>Harpochytrium</i> sp. JEL290             | KJ668051.1     | KJ668090.1     |
| <i>Helicogloea</i> sp. TUB 020325           | KF061294.1     | KF061297.1     |
| <i>Histoplasma capsulatum</i> NAM1          | X58572.1       | AAJI01002279   |
| <i>Hyaloraphidium curvatum</i>              | NG_017172.1    | NG_027646.1    |
| <i>Hydnellum geogenium</i>                  | AY752971.1     | AY631900.1     |
| <i>Hyphopichia burtonii</i>                 | AB018177.1     | NG_054819.1    |
| <i>Ichthyophonus hoferi</i>                 | U43712.1       | AY026370.1     |
| <i>Inonotus linteus</i>                     | HQ593855.1     | AY839831.1     |
| <i>Kappamyces laurelensis</i>               | DQ536478.1     | DQ273824.1     |
| <i>Kickxella alabastrina</i>                | AF007537.1     | KF848900.1     |
| <i>Kluyveromyces marxianus</i>              | CP023460.1     | CP023460.1     |
| <i>Laccaria bicolor</i>                     | JN939989.1     | AC156603.2     |
| <i>Lasallia pustulata</i>                   | JYIL01000614   | JYIL01000498   |
| <i>Leucosolenia</i> sp.                     | AF100945.1     | AY026372.1     |
| <i>Lichtheimia corymbifera</i>              | HM590662.1     | FJ345350       |
| <i>Lichtheimia ramosa</i>                   | JQ004933.1     | LK023322       |

|                                             |              |              |
|---------------------------------------------|--------------|--------------|
| <i>Lignosus rhinocerus</i>                  | FJ899144.1   | FJ899145.1   |
| <i>Linderina pennispora</i>                 | AF007538.1   | KF848902.1   |
| <i>Lobulomyces angularis</i>                | AF164253.2   | DQ273815.1   |
| <i>Macrophomina phaseolina</i>              | EF570502.1   | LHTN01002497 |
| <i>Magnaporthe grisea</i>                   | AF021794.1   | LOFB01000049 |
| <i>Meliola niessleana</i>                   | AF021794.1   | KC833049.1   |
| <i>Microstroma juglandis</i>                | DQ363313.1   | KP413052.1   |
| <i>Minimedusa</i> sp.                       | DQ915463.1   | DQ915476.1   |
| <i>Mixia osmundae</i> IAM 14324             | D14163.1     | AYOQ01000026 |
| <i>Monoblepharella mexicana</i> AFTOL ID 33 | AF164337.1   | DQ273777.1   |
| <i>Monosiga brevicollis</i>                 | AF100940.1   | EU011940.2   |
| <i>Mrakia blollopis</i>                     | BBPU01000016 | BBPU01000016 |
| <i>Mucor racemosus</i>                      | X54863.1     | AJ271061.1   |
| <i>Mycosphaerella punctiformis</i>          | AY490775.2   | AY490776.2   |
| <i>Nectria haematococca</i>                 | AC166539     | AC166539     |
| <i>Nematostella vectensis</i>               | AF254382.1   | ABAV01023333 |
| <i>Neocallimastix</i> sp. GE13              | DQ322625.1   | DQ273822.1   |
| <i>Neocatenulostroma microsporum</i>        | GU214520.1   | EU019255.2   |
| <i>Neolentinus</i> sp.                      | AF334920.1   | JX507692.1   |
| <i>Neurospora crassa</i>                    | FJ360521.1   | FJ360521.1   |
| <i>Nowakowskiella</i> sp. JEL127            | AY635835.1   | DQ273798.1   |
| <i>Nuclearia simplex</i>                    | AF349566.1   | AY148095.1   |
| <i>Ogataea trehaloabstinens</i>             | EU011694.1   | NG_055139.1  |
| <i>Olpidium brassicae</i>                   | NG_017176.1  | NG_027564.1  |
| <i>Pallidocercospora heimii</i>             | GU214541.1   | GU214438.1   |
| <i>Passalora fulva</i>                      | AY251109.2   | DQ008163.2   |
| <i>Passalora zambiae</i>                    | GU214562.1   | EU019272.2   |
| <i>Peltigera membranacea</i>                | JX181776.1   | JX181776.1   |
| <i>Penicillium verrucosum</i>               | JN938976.1   | AF510496.1   |
| <i>Peniophora</i> sp.                       | U59085.1     | JX507719.1   |
| <i>Phaeosphaeria nodorum</i>                | EU189212.1   | EF590320.2   |
| <i>Phaffia rhodozyma</i>                    | KF036689.1   | LSVH01000344 |
| <i>Phakopsora pachyrhizi</i> Thai1          | GACM01000695 | GACM01000003 |
| <i>Phanerochaete carnosa</i>                | AEHB01001395 | AEHB01001395 |
| <i>Phellinus igniarius</i>                  | AF026614.1   | AY839834.1   |
| <i>Phlyctochytrium planicorne</i>           | DQ536473.1   | DQ273813.1   |
| <i>Phycomyces blakesleeanus</i>             | NG_017190.1  | NG_027559.1  |
| <i>Physoderma maydis</i>                    | NG_017165.1  | NG_027645.1  |
| <i>Piptocephalis corymbifera</i>            | NG_017192.1  | NG_027616.1  |
| <i>Piriformospora indica</i>                | AY293147.1   | AY505557.1   |
| <i>Pleurotus ostreatus</i>                  | NG_013165.1  | AYUK01000002 |
| <i>Pneumocystis carinii</i>                 | XR_486829.3  | M86760.1     |
| <i>Polychytrium aggregatum</i> JEL109       | NG_017168.1  | NG_027613.1  |
| <i>Thoreauomyces humboldtii</i> JEL95       | AF164245.2   | DQ273776.1   |
| <i>Pseudocercospora fijiensis</i> CIRAD86   | AIHZ01000434 | AIHZ01000434 |
| <i>Pteromaktron</i> sp.                     | JX155623.1   | KF848907.1   |
| <i>Ramaria stricta</i>                      | AF026638.1   | FJ644512.2   |
| <i>Ramicandelaber longisporus</i>           | KC297615.1   | KF848913.1   |
| <i>Readeriella mirabilis</i>                | EU754110.2   | EU019291.2   |
| <i>Resinicium bicolor</i>                   | AF026615.1   | JQ768394.1   |
| <i>Rhizoclosmatium</i> sp. JEL347 h         | AY601709.1   | DQ273769.1   |
| <i>Rhizoctonia solani</i>                   | D85629.1     | HG345191     |

|                                         |                |              |
|-----------------------------------------|----------------|--------------|
| <i>Rhizophagus intraradices</i>         | AJ852526.1     | FJ235573.1   |
| <i>Rhizophlyctis rosea</i>              | NG_017175.1    | NG_027649.1  |
| <i>Rhizopus stolonifer</i>              | JN974022.1     | JNDS01000881 |
| <i>Rhodotorula mucilaginosa</i>         | AB021668.1     | JWTJ01000032 |
| <i>Rhodotorula toruloides</i>           | DQ647614.2     | CWKI01000013 |
| <i>Rozella allomycis</i>                | NG_017174.1    | NG_027561.1  |
| <i>Rozella</i> sp. JEL347               | AY601707.1     | DQ273766.1   |
| <i>Russula</i> sp,                      | U59093.1       | FJ644471.2   |
| <i>Saccharomyces cerevisiae</i>         | J01353.1       | CP011558.1   |
| <i>Saitoella complicata</i>             | JQ698935.1     | JQ689076.1   |
| <i>Salpingoeca infusionum</i>           | AF100941.1     | KT757478.1   |
| <i>Sanchytrium tribonematis</i>         | KY652374.1     | KY652373.1   |
| <i>Schizosaccharomyces pombe</i>        | NR_151432.1    | AY048171.1   |
| <i>Scopulariopsis brevicaulis</i>       | AY083220.1     | KJ443117.1   |
| <i>Sebacina incrustans</i>              | FJ641901.1     | FJ644513.2   |
| <i>Septoria leucanthemi</i>             | GU214586.1     | GU214492.1   |
| <i>Sistotrema brinkmannii</i>           | DQ898712.1     | JX535170.1   |
| <i>Smittium culicis</i>                 | AF277012.1     | KF848909.1   |
| <i>Smittium morbosum</i>                | AF277014.1     | KF848911.1   |
| <i>Smittium mucronatum</i>              | AF277030.1     | KF848910.1   |
| <i>Sparassis latifolia</i>              | KF309253.1     | GELB01011123 |
| <i>Spiromyces minutus</i>               | AF007542.1     | NG_042415.1  |
| <i>Spizellomyces punctatus</i>          | NG_017173.1    | ACOE01000320 |
| <i>Spizellomycete</i> sp. JEL355        | DQ536477.1     | DQ273821.1   |
| <i>Sporisorium scitamineum</i>          | LK056672.1     | CP010935.1   |
| <i>Suberites ficus</i>                  | AF100947.1     | AY026381.1   |
| <i>Sydowia polyspora</i>                | AY150054       | JQ768401.1   |
| <i>Symbiotaphrina buchneri</i>          | AY227716.1     | DQ248313     |
| <i>Taiwanofungus camphoratus</i>        | AJ487670.1     | JNBV01000010 |
| <i>Tapinella panuoides</i>              | AF026628.1     | DQ071746.2   |
| <i>Teratosphaeria suttonii</i>          | GU214615.1     | FJ493222.2   |
| <i>Termitomyces clypeatus</i>           | M036341.1      | HM036342.1   |
| <i>Tetrapisispora phaffii</i>           | XR_002431954.1 | NG_055035.1  |
| <i>Thermomyces lanuginosus</i>          | EF468714.1     | EF468715.1   |
| <i>Tilletia walkeri</i>                 | LWDG01000971   | LWDG01000971 |
| <i>Trechispora farinacea</i>            | EU909231.1     | EU909231.1   |
| <i>Tremella fuciformis</i>              | JN043523.1     | LBGW01000159 |
| <i>Tremella globispora</i>              | KF036703.1     | EF551317.1   |
| <i>Tremiscus helvelloides</i>           | DQ520100.1     | FJ644523.2   |
| <i>Trichoderma longibrachiatum</i> SMF2 | FJ605099.1     | ANBJ01000173 |
| <i>Trichoderma reesei</i> QM6a          | CP016237.1     | CP016237.1   |
| <i>Trichoplax adhaerens</i>             | L10828.1       | AY603697.1   |
| <i>Triparticalcar arcticum</i>          | DQ536480.1     | DQ273826.1   |
| <i>Umbelopsis ramanniana</i>            | NG_017189.1    | NG_027558.1  |
| <i>Ustilago maydis</i>                  | KP322952.1     | FJ644528.2   |
| <i>Uwebraunia dekkeri</i>               | AY251101.2     | EU019268.2   |
| <i>Verrucisporota daviesiae</i>         | GU214620.1     | FJ839669.2   |
| <i>Wolfiporia cocos</i>                 | AB022187.1     | EF397598.1   |
| <i>Yarrowia lipolytica</i>              | AB018158.2     | AJ616903.1   |
| <i>Zygoascus meyeriae</i>               | AJ508278.1     | DQ438189.1   |
